# Supplementary material for: A uniform cloning platform for mycobacterial genetics and protein production
Source: PubMed Central journal article supplement (PMC6015033; doi:10.1038/s41598-018-27687-5), 2018-06-22
Supplement: 41598_2018_27687_MOESM1_ESM.pdf [file 41598_2018_27687_MOESM1_ESM.pdf]

# SUPPLEMENTARY MATERIAL

## **A uniform cloning platform for mycobacterial genetics and protein production**

Fabian M. Arnold<sup>1</sup>, Michael Hohl<sup>1,2</sup>, Sille Remm<sup>1</sup>, Hendrik Koliwer-Brandl<sup>1</sup>, Sophia Adenau<sup>1</sup>, Sasitorn Chusri<sup>1,3</sup>, Peter Sander<sup>1</sup>, Hubert Hilbi<sup>1</sup> and Markus A. Seeger<sup>1,\*</sup>

<sup>1</sup> Institute of Medical Microbiology, University of Zurich, Switzerland

<sup>2</sup> Current address: Department of Life Sciences, Imperial College London, UK

<sup>3</sup> Current address: Faculty of Traditional Thai Medicine, Prince of Songkla University, Thailand

\* Corresponding author: m.seeger@imm.uzh.ch

Content:

Supplementary Figure S1

Supplementary Table S1

Supplementary Table S2

Supplementary Table S3

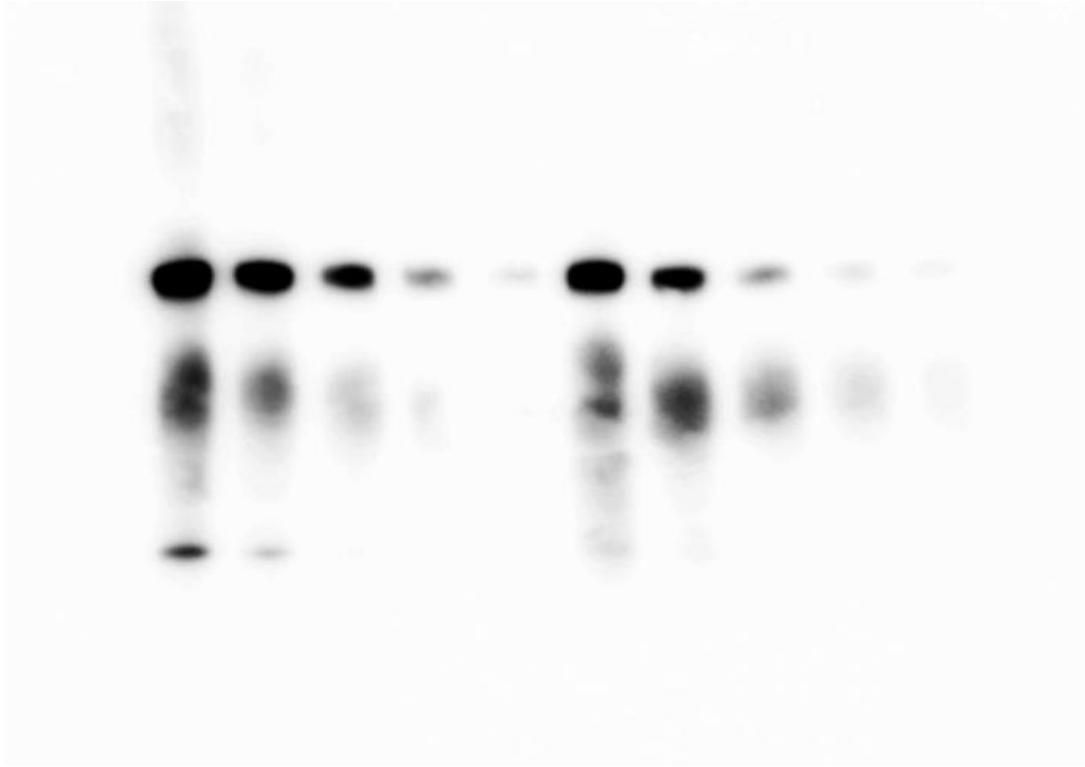

**Supplementary Figure S1:**

Original Western blot image used to generate Figure 4B.

**Table S1:** List of primers

| Primer name      | Sequence (5' to 3')                                      | 5'-modification |
|------------------|----------------------------------------------------------|-----------------|
| pGMCK Fw         | TTATACATAGTTGCTTAAGCTGCAGGGG                             | Phosphorylation |
| pGMCK Rv         | CATATGTATATCTCCTTCGCATGCCTCG                             | Phosphorylation |
| pBXC3GH Fw       | AGTTGAAGAGCGACCTGCAGACTG                                 |                 |
| pBXC3GH Rv       | TTAATGATGGTGATGATGATGGTGATGATGATGAC                      |                 |
| pMINTC3H Fw      | CATCATCATCACCATCATCATCACCATCAT                           | Phosphorylation |
| pMINTC3H Rv      | TGGACCTTGAACAAAACCTTCTAATGCAGAAG                         | Phosphorylation |
| pBXNH3 Fw        | CACCATCATCATCACCATCATCATCATC                             |                 |
| pBXNH3 Rv        | TTATTATGCAGAAGAGCTGAACTAGTGG                             |                 |
| pMYC_OriM Fw     | GTATtctagaGTGAGCCACCAGCTCCGTAAG                          |                 |
| pMYC_OriM Rv     | CAGTgaagactagcatGCCACGGATGCCACCACA                       |                 |
| pMINT_OriM Fw    | GTATtctagaTTGATGCCTGGCAGTCGATCG                          |                 |
| pMINT_OriM Rv    | CAGTgaagactagcatCCAGCTAGCAACAAAGCGACG                    |                 |
| pMINT/MEX_bb Fw  | TCCCGTTGAATATGGCTCATAACACCC                              |                 |
| pMINT/MEX_bb Rv  | TTGCAGTTTCATTTGATGCTCGATGAG                              |                 |
| pSET_apr Fw      | gtaccatggAGGATCTTCACCTAGATCCTT                           |                 |
| pSET_apr Rv      | gtatctagaATCAGCCGTCCAAATGCGGG                            |                 |
| pMYC_hyg Fw      | gtatctagaCTAGCGTACGATCGACTGCCAG                          |                 |
| pMYC_hyg Rv      | gtaccatggATAGTTGCCT-GACTCCCCGACGTG                       |                 |
| pMYC_bb Fw       | TAACAGCTTATCGATGTCGACGTAGTTAACTAGCG                      | Phosphorylation |
| pMYC_bb Rv       | CATGGTGGACTCCCTTTCTCTTATCGGG                             | Phosphorylation |
| pACE_sapl Fw     | GTGGCGTCGGGCTCaTCTACGTGGGTG                              |                 |
| pACE_sapl Rv     | CACCCACGTAGAtGAGCCCCGACGCCAC                             |                 |
| pACE_Apr Fw      | GCCACGTCGGGGAGTCAGGCAACTA                                | Phosphorylation |
| pACE_Apr Rv      | CTCTAGCTGATCACC GCGCCATGA                                | Phosphorylation |
| pMINTΔTetR Fw    | ACCAGGCCTAGATCTGGGGACCCTAG                               | Phosphorylation |
| pMINTΔTetR Rv    | GGATCATCGAGCCGAGAACGTTATCG                               | Phosphorylation |
| pBXC3GH Fw       | CATGATATCGATTACAAGGATGACGATGACAAGTTAGAAGTTTTGTTCAAGTCCAC | Phosphorylation |
| pBXC3GH Rv       | ATCTTTATAA-TCACCGTCATGGTCTTTGTAGTCTGCAGAAGAGCAGAACTAGTGG | Phosphorylation |
| pMINTΔTetR_bb Fw | CTTGTTGTCGTAGGTCTGCAGCGC                                 |                 |
| pMINTΔTetR_bb Rv | GCCAGTCTGAGGTCGCTCTTC                                    |                 |
| pBXC3F3GH_bb Fw  | GAAGAGCGACCTGCAGACTGGC                                   |                 |
| pBXC3F3GH_bb Rv  | CTTGTCATCGTCATCCTTGAATCG                                 |                 |
| pCOND_APR_bb Fw  | TAGTGAGCATTCCGCTTCCTCGCTCACTG                            | Phosphorylation |
| pCOND_APR_bb Rv  | ATCCTCGTGTGGTTGCTAGATGGC                                 | Phosphorylation |

|               |                                             |                 |
|---------------|---------------------------------------------|-----------------|
| pMA_FX Fw     | ctgctcttcagcaTCACTGCCCGCTTTCCAGTC           | Phosphorylation |
| pMA_FX Rv     | atgctctcaactTATTACGTCGCGCTCACTGGC           | Phosphorylation |
| Int Fw        | atataTCTCTTcAGTTTGTGCTAGCTGGCGGGAAC         |                 |
| Int Rv        | tatataGCTCTTcATGCATATGGGCCGGTCAAGATAGGT     |                 |
| pMA_SapI Fw   | TCCATTGCGCATTCAAGCT                         | Phosphorylation |
| pMA_SapI Rv   | ATCCCTTAACGTGAGTTTTTCGT                     | Phosphorylation |
| pDB77 Fw      | TAAGTTGGGTAACGCCAGGG                        |                 |
| pDB77 Rv      | GGTTTTTACCCCTCTCGGC                         |                 |
| pMA_DB77 Fw   | TGATCCCGGAAGAaCTGGTG                        |                 |
| pMA_DB77 Rv   | CACCAGtTCTTCCGGGATCA                        |                 |
| pKOΔsacB Fw   | GTCGtctagaTGAATCGCCCATCATCCAGC              |                 |
| pKOΔsacB Rv   | GTATggcgcgccTCCATTGCGCATTCAAGCT             |                 |
| pINIT_sacB Fw | GTATggcgcgccCTGATGCCGCATAGTTAAGCCAG         |                 |
| pINIT_sacB Rv | TCCTACTCAGGAGAGCGTTCACC                     |                 |
| pTE_bb Fw     | ATCAACGAGGACAGTCGCACGAC                     | Phosphorylation |
| pTE_bb Rv     | AGGCTCGCGTAGGAATCATCCG                      | Phosphorylation |
| pTE Fw        | atataTGGATCCgctcttcagcaTTCGCTTCTCGCTCACTGAC |                 |
| pTE Rv        | atataTGGATCCTCGTGTGGTTGCTAGATGGCTC          |                 |
| pFRA50 Fw     | ATATATggatccAGATCTCCATCCTGACGGATGG          |                 |
| pFRA50 Rv     | ATATATggatccGCTCTTCAACTCATTAGGCTCCTTGACGGTG |                 |
| ideR Fw       | atataTCTCTTcAGTAACGATCTTGTCGATACCACCGAG     |                 |
| ideR Rv       | tatataGCTCTTcATGCTTCGGTCAGCTGGCGGACCACCAC   |                 |
| ideR_int Fw   | ATATATggatccAGATCTCCATCCTGACGGATGG          |                 |
| ideR_int Rv   | TCAGACCTTCTCGACCTTGACG                      |                 |
| Pip Fw        | ACGTCGACACCAAGGACCAG                        |                 |
| Pip Rv        | TCAGGCTGTTGACCATCG                          |                 |

**Table S2:** List of plasmids used for plasmid construction

| Plasmid name         | Description                                                                                                                                     | Resistance | Reference        |
|----------------------|-------------------------------------------------------------------------------------------------------------------------------------------------|------------|------------------|
| pINIT                | Initial sequencing vector for FX-cloning                                                                                                        | Chl        | 24               |
| pBXC3GH              | FX expression vector based on the arabinose promoter with C-terminal GFP and His <sub>10</sub> tags                                             | Amp        | 24               |
| pBXNH3               | FX expression vector based on the arabinose promoter with N-terminal His <sub>10</sub> tag.                                                     | Amp        | 24               |
| pGMCKq1-10M1-sspBmyc | TetR based expression vector. Used as backbone for the pMINT and pMEX vectors.                                                                  | Kan        | 6                |
| pSET152              | Integrative vector used to amplify apramycin resistance gene                                                                                    | Apr        | 42               |
| pMYC                 | Acetamide inducible expression vector for mycobacteria. Used as backbone for the pACE vectors.                                                  | Hyg        | Addgene ID 42192 |
| pDB77                | Suicide vector for knockout generation in mycobacteria, harbouring the <i>galK</i> counterselection gene. Used as backbone for the pKO vectors. | Kan        | 29               |
| pTE                  | Replicative vector for mycobacteria used as backbone for pCOND vectors. Two version with apramycin or hygromycin resistance.                    | Apr / Hyg  | Addgene ID 20320 |

**Table S3:** List of primers used to clone mycobacterial flanking regions

|                      |                     |                                              |
|----------------------|---------------------|----------------------------------------------|
| MSMEG_5008/5009      | upstream flank Fw   | ATATATGCTCTTCTAGTCGCGCAACTCGTGACCTCCACGTACC  |
|                      | upstream flank Rv   | TATATATGCTCTTCAAGGCCCGCTACTCTGCACACGATCCTGAG |
|                      | downstream flank Fw | ATATATGCTCTTCTCCTGAAACTGCTGGTGCTCGACGAGGCCAC |
|                      | downstream flank Rv | TATATAGCTCTTCATGCGCGCAGCATCTTGGGTTCTGGTTGGC  |
| MSMEG_5659/5660      | upstream flank Fw   | ATATATGCTCTTCTAGTTACACCCGCGAGCTCGCCGAGTACTG  |
|                      | upstream flank Rv   | TATATATGCTCTTCAAGGAGCGAGCGCATGGTCAACGTGCACTG |
|                      | downstream flank Fw | ATATATGCTCTTCTCCTTACGCGAGCGCTGCATCGGTGTCGAA  |
|                      | downstream flank Rv | TATATAGCTCTTCATGCCGCCACGCTGGTCAAACGTTCGGCAG  |
| MSMEG_6225           | upstream flank Fw   | ATATATGCTCTTCTAGTTCTACGTGGTGGTGTGCTGCTGTG    |
|                      | upstream flank Rv   | TATATATGCTCTTCAAGGCTGTACGGAAAAAAGGGGTGTG     |
|                      | downstream flank Fw | ATATATGCTCTTCTCCTTCTACCGCAGCAACGTGACGTG      |
|                      | downstream flank Rv | TATATAGCTCTTCATGCACGAACTACCGACTACGACCTGC     |
| MSMEG_3563           | upstream flank Fw   | ATATATGCTCTTCTAGTACTCGCTTCTCGGTTCATGC        |
|                      | upstream flank Rv   | TATATATGCTCTTCAAGGACTCACCTGGCACCCGGAAC       |
|                      | downstream flank Fw | ATATATGCTCTTCTCCTGACGTCCTTTCACGCATCCGGC      |
|                      | downstream flank Rv | TATATAGCTCTTCATGCCCTTCGATGGTCATGATGTGCGCC    |
| MSMEG_5187           | upstream flank Fw   | ATATATGCTCTTCTAGTAAGGTGCACAGATGACTCCACCG     |
|                      | upstream flank Rv   | TATATATGCTCTTCAAGGCGGTTCTTCGATGTCATGTTGCGTAC |
|                      | downstream flank Fw | ATATATGCTCTTCTCCTCTGGACTTCTTCGTATCGCTGGCG    |
|                      | downstream flank Rv | TATATAGCTCTTCATGCTCGAACCCCATGGATCCCATCTCG    |
| MSMEG_6390           | upstream flank Fw   | ATATATGCTCTTCTAGTGTGGTGGTACGTGTCGAACTTCGG    |
|                      | upstream flank Rv   | TATATATGCTCTTCAAGGCCGCCAATGGTATGTCAATAAGTC   |
|                      | downstream flank Fw | ATATATGCTCTTCTCCTATCGGCTGGATCTGCACGCACG      |
|                      | downstream flank Rv | TATATAGCTCTTCATGCTTCAGCCACGACCAGACGGTGTCC    |
| MSMEG_5075_5076      | upstream flank Fw   | ATATATGCTCTTCTAGTACTGAACTTTCGCTGAGAAACCCGACC |
|                      | upstream flank Rv   | TATATATGCTCTTCAAGGTATGTGCGCTCTCCGAGGTGC      |
|                      | downstream flank Fw | ATATATGCTCTTCTCCTGGTGACAGCGCTGTTCTGTGATGGC   |
|                      | downstream flank Rv | TATATAGCTCTTCATGCCACGCGATTCTCGACAAGAACGTGC   |
| MSMEG_1502_1503_1504 | upstream flank Fw   | ATATATGCTCTTCTAGTGAAGGCACCAGCATCGAACAGATCGC  |
|                      | upstream flank Rv   | TATATATGCTCTTCAAGTACCAGCGGATTCACTGCTCGGG     |
|                      | downstream flank Fw | ATATATGCTCTTCTCCTGTTTCATCGATTGCGCGTGGAACTG   |
|                      | downstream flank Rv | TATATAGCTCTTCATGCTCAAGGAGATGGACCAGCTGCTCTC   |
| MSMEG_6509_6510      | upstream flank Fw   | ATATATGCTCTTCTAGTTCGCGTCGATCAACTTCGTCATCGC   |
|                      | upstream flank Rv   | TATATATGCTCTTCAAGGTATGAGTCCCTTCTCAGCAGCAGC   |
|                      | downstream flank Fw | ATATATGCTCTTCTCCTGGTCCGATAACCGACCAACCAACTG   |
|                      | downstream flank Rv | TATATAGCTCTTCATGCCCGATCTCGTTGAGCACCACCATG    |
| MSMEG_00017/0018     | upstream flank Fw   | ATATATGCTCTTCTAGTTCGTGATGTGCGCCGATCTGGTGC    |
|                      | upstream flank Rv   | TATATATGCTCTTCAAGGTACGCCAAAGTGGCCGATTGTGCG   |
|                      | downstream flank Fw | ATATATGCTCTTCTCCTGTGCGAAAACGGCAGCATGCAGAG    |
|                      | downstream flank Rv | TATATAGCTCTTCATGCTCGGCCAGTTGCGACTCGATCTCC    |

|            |                     |                                            |
|------------|---------------------|--------------------------------------------|
| MSMEG_1642 | upstream flank Fw   | ATATATGCTCTTCAAGTGAAGCGCCGTGGAACTCT        |
|            | upstream flank Rv   | TATATATGCTCTTCAAGGCAAACCTGCGCCTTTTCACG     |
|            | downstream flank Fw | ATATATGCTCTTCACTGCGGTCAACTCTATCGGTAC       |
|            | downstream flank Rv | TATATAGCTCTTCATGCACGAAGCCGGAGTCGAACGAC     |
| MSMEG_4380 | upstream flank Fw   | ATATATGCTCTTCAAGTGACGACGTGTGCTGCGAGA       |
|            | upstream flank Rv   | TATATATGCTCTTCAAGGGACCGACTCTGAGTTTGCC      |
|            | downstream flank Fw | ATATATGCTCTTCACTGATCATGGACCACATCACCT       |
|            | downstream flank Rv | TATATAGCTCTTCATGCCCTGGGTGTAGTGGATGATC      |
| MSMEG_2631 | upstream flank Fw   | ATATATGCTCTTCTAGTCGAAACGTCTCGCCAAGCGGATC   |
|            | upstream flank Rv   | TATATATGCTCTTCAAGGATCAGCCAAGGCCCGTGCG      |
|            | downstream flank Fw | ATATATGCTCTTCTCTTACGAGGTACGCGCTTGATCG      |
|            | downstream flank Rv | TATATAGCTCTTCATGCGTCACCGTCACGTTACCTCGAAAC  |
| MSMEG_3815 | upstream flank Fw   | ATATATGCTCTTCTAGTCGATTCGCGCTACTTCTCAGATACG |
|            | upstream flank Rv   | TATATATGCTCTTCAAGGCGCTGAGTAAGTGAGTGACTGAG  |
|            | downstream flank Fw | ATATATGCTCTTCTCTTCAATTCAGCCCGCGGCATC       |
|            | downstream flank Rv | TATATAGCTCTTCATGCGATCATCCGTCGTACGAGGAAC    |
| MSMEG_6221 | upstream flank Fw   | ATATATGCTCTTCTAGTCAACTACGTACGCCCCGACGAC    |
|            | upstream flank Rv   | TATATATGCTCTTCAAGGCGGCTCAGAGCTTTCCGGTG     |
|            | downstream flank Fw | ATATATGCTCTTCTCTTCCGCGGAGCTTAATCGCCTAACG   |
|            | downstream flank Rv | TATATAGCTCTTCATGCGCCACCTGGGGGATATC         |
| MSMEG_3705 | upstream flank Fw   | ATATATGCTCTTCTAGTGGACTCAGCGCTGCGACGATC     |
|            | upstream flank Rv   | TATATATGCTCTTCAAGGACGCTCTCCTCGTCGGGATCAG   |
|            | downstream flank Fw | ATATATGCTCTTCTCTCTCGCTGAGTTCTGCGCTCG       |
|            | downstream flank Rv | TATATAGCTCTTCATGCCAGATCGCGGCTTGGTCTCCATC   |
| MSMEG_3670 | upstream flank Fw   | ATATATGCTCTTCTAGTTGAGCTCACGGCACGGCTGTAC    |
|            | upstream flank Rv   | TATATATGCTCTTCAAGGCCGACCCGCAACAACCTAGC     |
|            | downstream flank Fw | ATATATGCTCTTCTCTTTCGGATCCCACGAACGCGAGGCC   |
|            | downstream flank Rv | TATATAGCTCTTCATGCAGTGGTGACAGAACAGCGTGACC   |
| MSMEG_3672 | upstream flank Fw   | ATATATGCTCTTCTAGTAAGTACGTGACCTGGGCAACCACAC |
|            | upstream flank Rv   | TATATATGCTCTTCAAGGTACGGTCGGCCTCGCGTTCGTG   |
|            | downstream flank Fw | ATATATGCTCTTCTCTCTCCTCAGGTGTTCACGATCGAGTTG |
|            | downstream flank Rv | TATATAGCTCTTCATGCAGTGGTGACAGAACAGCGTGACC   |
| MS_5046    | upstream flank Fw   | ATATATGCTCTTCTAGTAAGTACGCCGCGGTGATCGT      |
|            | upstream flank Rv   | TATATATGCTCTTCAAGGACCCTCGCTCACTGAGCGAACAG  |
|            | downstream flank Fw | ATATATGCTCTTCTCTATGACAAGTCGGTGGTGAATCGGG   |
|            | downstream flank Rv | TATATAGCTCTTCATGCGTTAACGAACGGAGATTCCCGCGCT |
| MS_5670    | upstream flank Fw   | ATATATGCTCTTCTAGTTGAGATTGTGTGTCGCTGATGAGCG |
|            | upstream flank Rv   | TATATATGCTCTTCAAGGTGAACCTGCCAGGACACG       |
|            | downstream flank Fw | ATATATGCTCTTCTCTCATAACGATTGTGAAAGCACAACCTG |
|            | downstream flank Rv | TATATAGCTCTTCATGCCTTCGACGGTTCCCGCGCAAC     |
